# Supplementary material for: A novel soft hydrothermal (SHY) route to crystalline PbS and CdS nanoparticles exhibiting diverse morphologies
Source: Royal Society of Chemistry journal article supplement (doi:10.1039/b612934j), 2006-01-01
Supplement: b612934j.pdf [file b612934j.pdf]

Electronic Supplementary Information

## A novel soft hydrothermal (SHY) route to crystalline PbS and CdS nanoparticles exhibiting diverse morphologies

Deborah Berhanu, Kuveshni Govender, David Smyth-Boyle, Martin Archbold, Douglas P. Halliday, and Paul O'Brien\*

| TEM | [Prec]                | [TG]                  | TG/Prec | Additional [OH]       | pH   | Morphology of crystallites                                                                                     |
|-----|-----------------------|-----------------------|---------|-----------------------|------|----------------------------------------------------------------------------------------------------------------|
| a   | $2.48 \times 10^{-2}$ | 1.84                  | 74.2    | 2.38                  | ~14  | Truncated cubes. 10 min reaction                                                                               |
| b-c | $1.24 \times 10^{-2}$ | 1.84                  | 148.4   | $7.1 \times 10^{-3}$  | ~9   | Cubes (d) and rods (e), former being minor product. 5 min reaction.                                            |
| d   | $7.43 \times 10^{-3}$ | 1.84                  | 247.6   | 2.38                  | ~14  | Rods and their assemblies. 10 min reaction.                                                                    |
| e   | $2.48 \times 10^{-3}$ | 1.84                  | 741.9   | $7.94 \times 10^{-1}$ | ~14  | Hexagons. 5 min reaction.                                                                                      |
| f-g | $1.6 \times 10^{-3}$  | $1.16 \times 10^{-2}$ | 7.25    | none                  | ~5-6 | Smaller hexagons and rods. 5 min reaction.                                                                     |
| h-l | $2.3 \times 10^{-2}$  | 1.84                  | 80.0    | 2.38                  | ~14  | Bipods, tripods, triangles/prisms, tetradecahedrons and hexagons. 10 min reaction. <i>Smaller crystallites</i> |

**Table A.** Summary of experimental conditions and reaction stoichiometries employed during soft-hydrothermal (SHY) PbS nanoparticle syntheses. Morphologies of as-obtained crystallites, as shown in micrographs in Figure 1, are indicated. All concentrations in  $\text{mol dm}^{-3}$ .

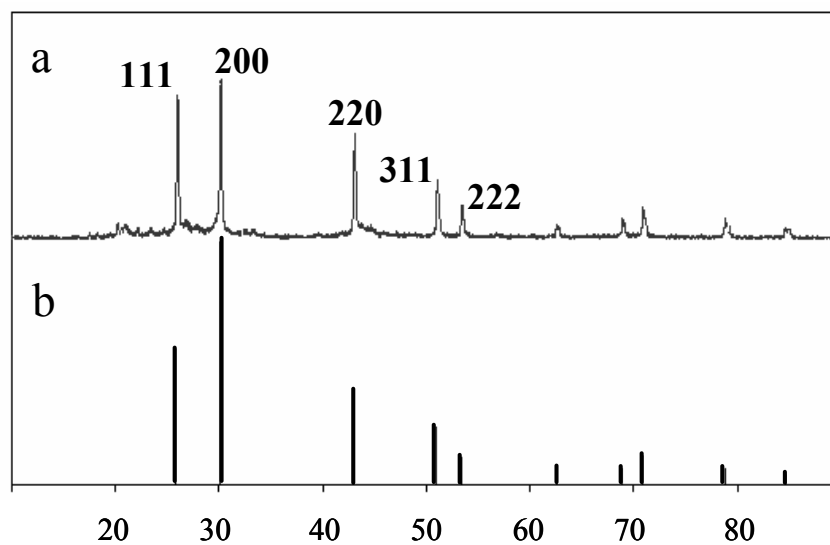

**Figure A.** *a.* Representative powder XRD of PbS nanocrystallites obtained during soft-hydrothermal (SHT) experiments. Diffractogram obtained for truncated cubic nanocrystals as shown in Figure 1*a*. Diffractogram of standard galena (crystalline PbS) reproduced from data given in JCPDS 05-0592.

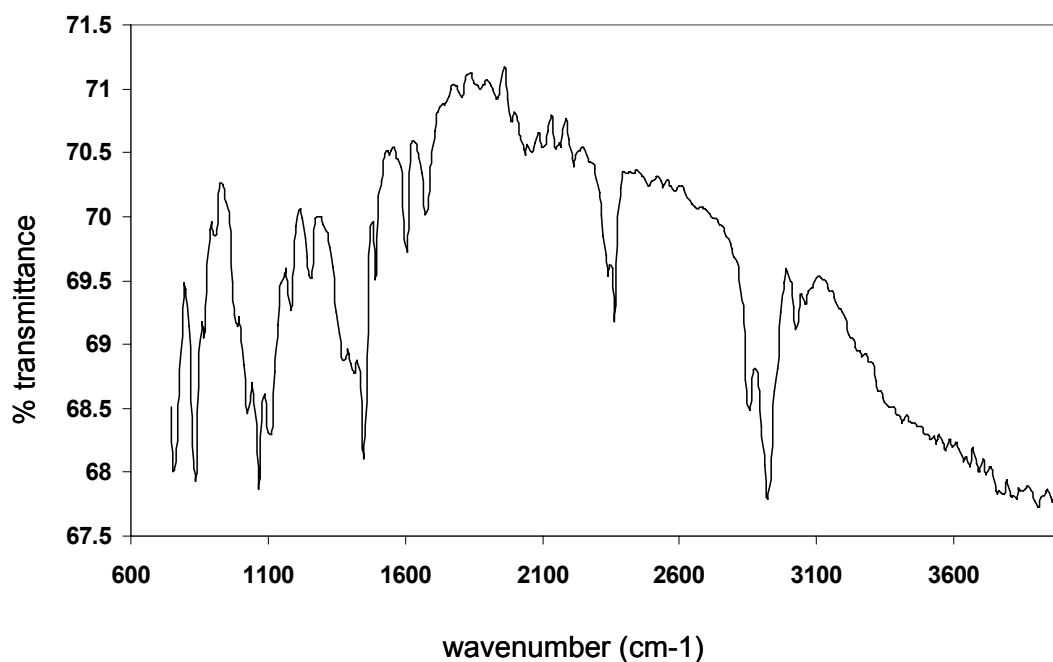

**Figure B.** FT-IR of thioglycerol-capped PbS nanocrystals obtained using the as-described soft-hydrothermal (SHT) route. The characteristic S-H stretching vibration of free 1-thioglycerol at  $\sim 2560\text{ cm}^{-1}$  is absent, as expected for coordinated thioglycerol. The strong absorption centred at  $\sim 2350\text{ cm}^{-1}$  is consistent with the presence of bipyridyl moieties. Similar features and conclusions have been reported in ref. 12.

| <b>[Prec]</b>        | <b>[TG]</b> | <b>TG/Prec</b> | <b>EN</b> | <b>Morphology of crystallites</b>    |
|----------------------|-------------|----------------|-----------|--------------------------------------|
| $1.8 \times 10^{-3}$ | 0.11        | 61.1           | 0.15      | 5 min reaction, elliptical particles |
| $1.8 \times 10^{-3}$ | 0.11        | 61.1           | 0.15      | 10 min; oblate nanoparticles         |
| $1.8 \times 10^{-3}$ | 0.11        | 61.1           | 0.15      | 20 min; particle growth              |
| $1.8 \times 10^{-3}$ | 0.11        | 61.1           | 0.15      | 30 min; aggregation of nanoparticles |

**Table B.** Summary of experimental conditions and reaction stoichiometries employed during soft-hydrothermal (SHT) CdS nanoparticle syntheses. Morphologies of as-obtained crystallites, as shown in micrographs in Figure 3, are indicated. Concentrations in  $\text{mol dm}^{-3}$ .
